# Supplementary material for: Acupuncture in the Treatment of a Female Patient Suffering from Chronic Schizophrenia and Sleep Disorders
Source: Hindawi journal article supplement (doi:10.1155/2016/6745618), 2016-01-01
Supplement: f1 [file 6745618.f1.pdf]

## Supplementary Material

**Supplementary Table 3** Raw actiwatch data for our 44-year-old female outpatient suffering from chronic schizophrenia and sleep disorders before and after acupuncture treatment.

| <b>Actiwatch Sleep Parameters</b>       | <b>Before Acupuncture</b> |          |          |          |          |          |          |          |          |           |           |           |           |           |
|-----------------------------------------|---------------------------|----------|----------|----------|----------|----------|----------|----------|----------|-----------|-----------|-----------|-----------|-----------|
| <i>Days</i>                             | <i>1</i>                  | <i>2</i> | <i>3</i> | <i>4</i> | <i>5</i> | <i>6</i> | <i>7</i> | <i>8</i> | <i>9</i> | <i>10</i> | <i>11</i> | <i>12</i> | <i>13</i> | <i>14</i> |
| Sleep efficiency <sup>1</sup>           | 83.5                      | 82.7     | 83.9     | 86.2     | 84.9     | 86.8     | 82.4     | 45.3     | 86.3     | 86.9      | 66.5      | 85.7      | 77.9      | 85.4      |
| Sleep latency <sup>2</sup>              | 47                        | 33       | 13       | 30       | 33       | 7        | 25       | 43       | 4        | 16        | 37        | 23        | 17        | 18        |
| Absolute actual sleep time <sup>2</sup> | 685                       | 677      | 590      | 550      | 690      | 614      | 588      | 288      | 548      | 651       | 341       | 684       | 600       | 659       |
| Absolute actual wake time <sup>2</sup>  | 84                        | 109      | 98       | 58       | 89       | 84       | 98       | 274      | 76       | 81        | 121       | 90        | 148       | 95        |
| Relative actual sleep <sup>1</sup>      | 89.1                      | 86.1     | 85.8     | 90.5     | 88.6     | 88       | 85.7     | 51.2     | 87.8     | 88.9      | 73.8      | 88.4      | 80.2      | 87.4      |
| Relative actual wake <sup>1</sup>       | 10.9                      | 13.9     | 14.2     | 9.5      | 11.4     | 12       | 14.3     | 48.8     | 12.2     | 11.1      | 26.2      | 11.6      | 19.8      | 12.6      |
| Assumed sleep <sup>2</sup>              | 769                       | 786      | 688      | 608      | 779      | 698      | 686      | 562      | 624      | 732       | 462       | 774       | 748       | 754       |
| <b>Actiwatch Sleep Parameters</b>       | <b>After Acupuncture</b>  |          |          |          |          |          |          |          |          |           |           |           |           |           |
| <i>Days</i>                             | <i>1</i>                  | <i>2</i> | <i>3</i> | <i>4</i> | <i>5</i> | <i>6</i> | <i>7</i> | <i>8</i> | <i>9</i> | <i>10</i> | <i>11</i> | <i>12</i> | <i>13</i> | <i>14</i> |
| Sleep efficiency <sup>1</sup>           | 84.6                      | 83.4     | 83.6     | 86.1     | 84.9     | 88.8     | 84.4     | 83.5     | 88.1     | 89        | 80.7      | 85.8      | 90.7      | 85.4      |
| Sleep latency <sup>2</sup>              | 15                        | 9        | 10       | 24       | 17       | 10       | 9        | 32       | 19       | 20        | 19        | 6         | 1         | 6         |
| Absolute actual sleep time <sup>2</sup> | 440                       | 649      | 588      | 454      | 508      | 541      | 667      | 364      | 682      | 548       | 613       | 386       | 408       | 678       |
| Absolute actual wake time <sup>2</sup>  | 58                        | 113      | 91       | 47       | 70       | 56       | 114      | 34       | 68       | 45        | 128       | 58        | 39        | 110       |
| Relative actual sleep <sup>1</sup>      | 88.4                      | 85.2     | 86.6     | 90.6     | 87.9     | 90.6     | 85.4     | 91.5     | 90.9     | 92.4      | 82.7      | 86.9      | 91.3      | 86        |
| Relative actual wake <sup>1</sup>       | 11.6                      | 14.8     | 13.4     | 9.4      | 12.1     | 9.4      | 14.6     | 8.5      | 9.1      | 7.6       | 17.3      | 13.1      | 8.7       | 14        |
| Assumed sleep <sup>2</sup>              | 498                       | 762      | 679      | 501      | 578      | 597      | 781      | 398      | 750      | 593       | 741       | 444       | 447       | 788       |

<sup>1</sup> in percentages, <sup>2</sup> in minutes
